# Supplementary material
Source: publisher site journal article supplement (https://www.dovepress.com/article/594400)
Supplement: Supplementary file 1 [file 594400%20Supplementary%20Material.docx]

**Table S1. SINTA Index of Selected Studies**

| No | Author (Year) | Study Design | Population/Sample | Intervention Duration | Evaluation Method | Main Findings | Implementation Challenges | Study Recommendations | Link Article | Indexing |
| --- | --- | --- | --- | --- | --- | --- | --- | --- | --- | --- |
| 1 | Etrawati et al. (2023) 19 | Quasi-experimental (2 groups) | 23 Posyandu cadres | 1 session | Pre–post test + control group | Significant improvement in cadre knowledge (p = 0.002). | Intervention was not sustainable. | Further interactive and continuous training is required. | <https://doi.org/10.21776/ub.ijhn.2023.010.02.3> | S2 |
| 3 | Mulyati & Astuti (2020) 21 | Quasi-experimental pre–post design | 90 mothers & cadres | 3 months | Pre–post test (t-test) | Significant increase in knowledge among both mothers and cadres (p = 0.001). | Cross-professional collaboration requires structural support. | Strengthening support and collaboration is necessary. | <https://doi.org/10.37341/jkg.v5i2.105> | S4 |
| 4 | Kusumawati et al. (2024) 22 | Qualitative (observation, interview, document analysis) | Health cadres in Ternyang Village | Intensive short-term training | Needs analysis using fishbone, USG prioritization, SWOT analysis, and post-training effectiveness evaluation | Cadre capacity increased up to 70% in mastering basic competencies; improved coordination and service efficiency. | Community preference for specialist doctors; limited technology and communication tools among cadres. | Continuous, collaborative, and adaptive training strategies based on local needs are required. | doi:10.58344/locus.v3i12.3472 | S4 |
| 5 | Mediani, H. S., Nurhidayah, I., & Lukman, M. (2020) 23 | Descriptive study | 44 health cadres from all sub-districts in Karawang | One intensive training session | Pre–post test assessing cadre knowledge & motivation scores | 77.55% cadres had good knowledge; 68.26% had moderate motivation; improvements were noted after training. | Motivation remained moderate, particularly related to incentives; need for continuous training. | Further empowerment focusing on nutrition and systematic motivation enhancement is necessary. | https://doi.org/10.24198/mkk.v3i1.26415 | S3 |
| 13 | Weningtyas et al. (2023) 31 | Pre-experimental, one-group pre-test post-test design | 20 Posyandu cadres in Dilem Village | 120 minutes (1 session) | Pre-test and post-test (10 multiple-choice questions); Wilcoxon test for statistical analysis | Average knowledge scores increased by 16.5 points (58 → 74.5; p < 0.001); 17 out of 20 participants improved their scores. | Not specified in detail; time limitations and small sample size noted. | Short courses are effective for increasing cadre knowledge on early stunting detection and anthropometry; training should be optimized as a community empowerment strategy. | https://doi.org/10.20473/Ijph.v18i3.2023.530-539 | S3 |
| 27 | Desi et al. (2023) 45 | Quasi-experiment (pre–post one group design) | 35 posyandu cadres (aged 15–44 years), purposive sampling | 6 months (May–Oct 2022) | Pre–post test, paired t-test | Knowledge increased from 72.01 → 93.31; MUAC skills: 7.71 → 19.43; Hb measurement skills: 9.71 → 15; stunting detection ability improved from 0% → 100% (p < 0.001). | Some cadres did not fully follow procedures during measurement; implementation was limited due to COVID-19 restrictions. | Continuous training and cadre monitoring are recommended for program sustainability. | 10.47539/gk.v15i2.426 | S4 |
| 28 | Sitorus et al. (2021) 46 | Quasi-experiment (pretest–posttest one group design) | 30 posyandu cadres (random sampling) | 1 month (Sept–Oct 2020) | Pre–post test (Wilcoxon) | Knowledge improved from 32.8 → 87.1 (p < 0.001); skills improved from 25.8 → 79.2 (p < 0.001). | Limited time; suboptimal supervision due to COVID-19 restrictions. | Routine cadre training and rolling cadre involvement every 3 months are suggested. | 10.33860/jik.v15i3.459 | S3 |
| 33 | Widiasih et al. (2025) 1 | Pre-experiment (pre–post) | 36 posyandu cadres | 3 days (25–27 Oct 2022) | Pre–post test (knowledge and skills questionnaire) | Significant improvement in cadres’ knowledge and skills after training (p < 0.001). Hands-on practice activities were highly effective. | No long-term monitoring; absence of control group; baseline cadre abilities varied. | Continued training, long-term monitoring, and cross-sectoral involvement (cadres, health centers, local government) are needed. | DOI : [10.30867/action.v10i1.2165](http://dx.doi.org/10.30867/action.v10i1.2165) | S2 |
| 51 | Astutik, J., Suprapto, B., & Abidin, Z. (2025) 68 | Mulyoagung Village, Dau Sub-district, Malang Regency, East Java, Indonesia | Community service (participatory approach with training and mentoring design) | Conducted in 4 stages (identification, socialization, implementation, evaluation) during Dec 2024 – Apr 2025 | Pre-test and post-test evaluation, observation, and participant feedback | Cadres’ understanding of stunting, causes, and impacts improved significantly. Cadres applied training in community programs and disseminated information through PKK and Posyandu activities. | Limited resources and dependence on university facilitation for continuity; sustainability may decline without local government support. | Need for continuous community-based mentoring, integration of behavior change education in routine Posyandu, and collaboration with local stakeholders to sustain efforts. | https://doi.org/10.22219/jcse.v6i1.39052 | S3 |
| 52 | Eny & Dwiyanti (2025) 69 | Mondokan Village, Sragen Regency, Central Java, Indonesia | Quasi-experimental (one-group pre-test and post-test design, no control group) | 1 month (3 mentoring sessions) | Pre-test and 3 post-tests using questionnaires; Friedman test for analysis | Significant improvement in knowledge and attitudes of pregnant women regarding stunting prevention (p = 0.000). | Limited duration of intervention and absence of control group may limit long-term effect measurement. | Strengthen continuous mentoring and KPM capacity building; include KPM in local government stunting programs; integrate education for 1000 HPK target. | 10.36566/mjph/Vol8.Iss1/413 | S4 |
